# Supplementary material for: Effervescent tablet-enhanced acidic ionic liquid-assisted in situ solvent formation magnetic solid-phase extraction for the detection of three phenolic pesticides in four kinds of crop flour samples
Source: Royal Society of Chemistry journal article supplement (doi:10.1039/d4nj01294a), 2024-01-01
Supplement: d4nj01294a2.pdf [file d4nj01294a2.pdf]

**Supplementary Table 1.** Plackett-Burman factorial design for determination of significant factors.

| Run | Factors |    |    |    |    |    |    |    |    | Recovery (%) |            |         |
|-----|---------|----|----|----|----|----|----|----|----|--------------|------------|---------|
|     | a       | b  | c  | d  | e  | f  | g  | h  | j  | Dinoseb      | Bromoxynil | Ioxynil |
| 1   | 1       | -1 | -1 | -1 | 1  | -1 | 1  | 1  | -1 | 67.6         | 94.5       | 73.9    |
| 2   | -1      | -1 | -1 | 1  | -1 | 1  | 1  | -1 | 1  | 29.9         | 49.4       | 38.7    |
| 3   | -1      | 1  | 1  | 1  | -1 | -1 | -1 | 1  | -1 | 40.9         | 65.1       | 51.9    |
| 4   | 1       | -1 | 1  | 1  | 1  | -1 | -1 | -1 | 1  | 41.7         | 66.1       | 51.6    |
| 5   | -1      | -1 | -1 | -1 | -1 | -1 | -1 | -1 | -1 | 44.6         | 73.4       | 64.9    |
| 6   | -1      | 1  | 1  | -1 | 1  | 1  | 1  | -1 | -1 | 24.8         | 42.3       | 36.1    |
| 7   | 1       | 1  | 1  | -1 | -1 | -1 | 1  | -1 | 1  | 10.1         | 20.9       | 14.1    |
| 8   | 1       | 1  | -1 | 1  | 1  | 1  | -1 | -1 | -1 | 24.8         | 44.9       | 33.7    |
| 9   | -1      | -1 | 1  | -1 | 1  | 1  | -1 | 1  | 1  | 29.1         | 49.6       | 33.4    |
| 10  | 1       | -1 | 1  | 1  | -1 | 1  | 1  | 1  | -1 | 68.9         | 90.3       | 78.7    |
| 11  | 1       | 1  | -1 | -1 | -1 | 1  | -1 | 1  | 1  | 73.2         | 102.1      | 84.8    |
| 12  | -1      | 1  | -1 | 1  | 1  | -1 | 1  | 1  | 1  | 37.8         | 63.7       | 60.1    |

**Supplementary Table 2.** Factors, symbols and levels for the CCD

| Factor                                  | Symbol | Level           |     |     |     |                  |
|-----------------------------------------|--------|-----------------|-----|-----|-----|------------------|
|                                         |        | $-\alpha$ (low) | -1  | 0   | 1   | $+\alpha$ (high) |
| Amount of $\text{Na}_2\text{CO}_3$ (mg) | A      | 50              | 70  | 100 | 130 | 150              |
| Amount of AIL (mg)                      | B      | 200             | 280 | 400 | 520 | 600              |
| Amount of $\text{Fe}_3\text{O}_4$ (mg)  | C      | 15              | 21  | 30  | 39  | 45               |

**Supplementary Table 3.** Design matrix and responses for the CCD

| Run | Block | A: Amount of<br>Na <sub>2</sub> CO <sub>3</sub> (mg) | B: Amount of<br>AIL (mg) | C: Amount of<br>Fe <sub>3</sub> O <sub>4</sub> | Recovery<br>(%) |
|-----|-------|------------------------------------------------------|--------------------------|------------------------------------------------|-----------------|
| 1   | 1     | 100                                                  | 400                      | 30                                             | 102.3           |
| 2   | 1     | 100                                                  | 400                      | 30                                             | 98.6            |
| 3   | 1     | 70                                                   | 520                      | 21                                             | 48.9            |
| 4   | 1     | 130                                                  | 280                      | 21                                             | 61.9            |
| 5   | 1     | 130                                                  | 520                      | 21                                             | 73.1            |
| 6   | 1     | 70                                                   | 280                      | 39                                             | 57.9            |
| 7   | 1     | 100                                                  | 400                      | 30                                             | 105.8           |
| 8   | 1     | 70                                                   | 520                      | 39                                             | 70.9            |
| 9   | 1     | 100                                                  | 400                      | 30                                             | 97.8            |
| 10  | 1     | 70                                                   | 280                      | 21                                             | 48.2            |
| 11  | 1     | 130                                                  | 520                      | 39                                             | 93.2            |
| 12  | 1     | 130                                                  | 280                      | 39                                             | 71.7            |
| 13  | 2     | 100                                                  | 600                      | 30                                             | 80.9            |
| 14  | 2     | 100                                                  | 400                      | 30                                             | 104.6           |
| 15  | 2     | 100                                                  | 400                      | 15                                             | 60.8            |
| 16  | 2     | 150                                                  | 400                      | 30                                             | 83.7            |
| 17  | 2     | 100                                                  | 400                      | 45                                             | 85.8            |
| 18  | 2     | 50                                                   | 400                      | 30                                             | 59.5            |
| 19  | 2     | 100                                                  | 400                      | 30                                             | 101.8           |
| 20  | 2     | 100                                                  | 200                      | 30                                             | 63.3            |

**Supplementary Table 4.** Precision and accuracy data for the determination of PPs in wheat, rice, corn and soybean flour samples (6 days with 6 replicates).

| Analytes    | Compound   | Concentration ( $\mu\text{g kg}^{-1}$ ) |            |        | RSD (%)   | Concentration ( $\mu\text{g kg}^{-1}$ ) |            |        | RSD (%)   |
|-------------|------------|-----------------------------------------|------------|--------|-----------|-----------------------------------------|------------|--------|-----------|
|             |            | Spiked                                  | Detected   | ER (%) | Intra-day | Spiked                                  | Detected   | ER (%) | Inter-day |
| Wheat flour | Dinoseb    | 10                                      | 9.3±0.6    | 93.0   | 3.2       | 10                                      | 9.4±0.7    | 94.0   | 3.7       |
|             |            | 50                                      | 49.1±1.3   | 98.2   | 1.3       | 50                                      | 46.2±2.1   | 92.4   | 2.3       |
|             |            | 100                                     | 96.5±2.2   | 96.5   | 1.1       | 100                                     | 97.8±4.6   | 97.8   | 2.4       |
|             |            | 500                                     | 486.8±5.6  | 97.4   | 0.6       | 500                                     | 487.6±6.2  | 97.5   | 0.6       |
|             | Bromoxynil | 10                                      | 9.2±0.5    | 92.0   | 2.7       | 10                                      | 9.3±0.8    | 93.0   | 4.3       |
|             |            | 50                                      | 47.8±2.4   | 95.6   | 2.5       | 50                                      | 45.2±3.2   | 90.4   | 3.5       |
|             |            | 100                                     | 93.6±4.1   | 93.6   | 2.2       | 100                                     | 94.7±5.4   | 94.7   | 2.9       |
|             |            | 500                                     | 506.3±4.4  | 101.3  | 0.4       | 500                                     | 492.8±7.2  | 98.6   | 0.7       |
|             | Ioxynil    | 10                                      | 9.1±1.2    | 91.0   | 6.6       | 10                                      | 8.9±1.3    | 89.0   | 7.3       |
|             |            | 50                                      | 46.6±1.8   | 93.2   | 1.9       | 50                                      | 46.2±2.6   | 92.4   | 2.8       |
|             |            | 100                                     | 102.6±2.5  | 102.6  | 1.2       | 100                                     | 98.6±3.6   | 98.6   | 1.8       |
|             |            | 500                                     | 510.5±4.8  | 102.1  | 0.5       | 500                                     | 489.2±6.2  | 97.8   | 0.6       |
| Rice flour  | Dinoseb    | 10                                      | 9.1±0.8    | 91.0   | 4.4       | 10                                      | 8.9±1.1    | 89.0   | 6.2       |
|             |            | 50                                      | 47.8±2.3   | 95.6   | 2.4       | 50                                      | 46.1±2.6   | 92.2   | 2.8       |
|             |            | 100                                     | 96.2±3.3   | 96.2   | 1.7       | 100                                     | 95.8±4.6   | 95.8   | 2.4       |
|             |            | 500                                     | 499.2±6.4  | 99.8   | 0.6       | 500                                     | 504.7±8.7  | 100.9  | 0.9       |
|             | Bromoxynil | 10                                      | 9.1±1.1    | 91.0   | 6.0       | 10                                      | 9.2±1.6    | 92.0   | 8.7       |
|             |            | 50                                      | 47.8±3.2   | 95.6   | 3.3       | 50                                      | 48.2±3.8   | 96.4   | 3.9       |
|             |            | 100                                     | 92.7±4.6   | 92.7   | 2.5       | 100                                     | 93.5±6.6   | 93.5   | 3.5       |
|             |            | 500                                     | 478.6±6.3  | 95.7   | 0.7       | 500                                     | 479.6±10.2 | 95.9   | 1.1       |
|             | Ioxynil    | 10                                      | 8.7±0.9    | 87.0   | 5.2       | 10                                      | 9.1±1.4    | 91.0   | 7.7       |
|             |            | 50                                      | 45.6±2.6   | 91.2   | 2.9       | 50                                      | 46.1±4.8   | 92.2   | 5.2       |
|             |            | 100                                     | 96.8±6.4   | 96.8   | 3.3       | 100                                     | 97.6±8.2   | 97.6   | 4.2       |
|             |            | 500                                     | 457.9±11.2 | 91.6   | 1.2       | 500                                     | 482.7±15.2 | 96.5   | 1.6       |

|                  |            |     |            |       |     |     |            |       |     |
|------------------|------------|-----|------------|-------|-----|-----|------------|-------|-----|
|                  |            | 10  | 8.8±1.1    | 88.0  | 6.3 | 10  | 9.1±1.2    | 91.0  | 6.6 |
|                  |            | 50  | 46.2±3.7   | 92.4  | 4.0 | 50  | 47.6±4.3   | 95.2  | 4.5 |
|                  | Dinoseb    | 100 | 92.7±3.9   | 92.7  | 2.1 | 100 | 90.6±5.2   | 90.6  | 2.9 |
|                  |            | 500 | 462.5±6.2  | 92.5  | 0.7 | 500 | 478.6±7.8  | 95.7  | 0.8 |
|                  |            | 10  | 9.2±0.8    | 92.0  | 4.3 | 10  | 8.9±1.2    | 89.0  | 6.7 |
|                  |            | 50  | 51.3±2.2   | 102.6 | 2.1 | 50  | 53.6±2.7   | 107.2 | 2.5 |
| Corn<br>flour    | Bromoxynil | 100 | 104.5±4.2  | 104.5 | 2.0 | 100 | 106.6±5.4  | 106.6 | 2.5 |
|                  |            | 500 | 517.2±9.4  | 103.4 | 0.9 | 500 | 509.7±11.3 | 101.9 | 1.1 |
|                  |            | 10  | 8.8±0.9    | 88.0  | 5.1 | 10  | 9.6±1.3    | 96.0  | 6.8 |
|                  |            | 50  | 50.8±4.7   | 101.6 | 4.6 | 50  | 49.7±4.6   | 99.4  | 4.6 |
|                  | Ioxynil    | 100 | 105.5±5.1  | 105.5 | 2.4 | 100 | 100.6±5.3  | 100.6 | 2.6 |
|                  |            | 500 | 509.3±7.8  | 101.9 | 0.8 | 500 | 491.8±8.5  | 98.4  | 0.9 |
|                  |            | 10  | 8.6±1.4    | 86.0  | 8.1 | 10  | 8.7±1.3    | 87.0  | 7.5 |
|                  |            | 50  | 46.6±3.1   | 93.2  | 3.3 | 50  | 48.3±3.6   | 96.6  | 3.7 |
|                  | Dinoseb    | 100 | 92.2±4.3   | 92.2  | 2.3 | 100 | 91.5±5.2   | 92.7  | 2.8 |
|                  |            | 500 | 478.3±8.2  | 95.7  | 0.9 | 500 | 482.2±8.8  | 96.4  | 0.9 |
|                  |            | 10  | 9.1±1.1    | 91.0  | 6.0 | 10  | 9.2±1.3    | 92.0  | 7.1 |
|                  |            | 50  | 48.3±2.6   | 96.6  | 2.7 | 50  | 48.7±3.3   | 97.4  | 3.4 |
| Soybean<br>flour | Bromoxynil | 100 | 104.2±4.6  | 104.2 | 2.2 | 100 | 99.5±4.5   | 99.5  | 2.3 |
|                  |            | 500 | 514.6±6.8  | 102.9 | 0.7 | 500 | 498.3±10.6 | 99.7  | 1.1 |
|                  |            | 10  | 8.5±0.9    | 85.0  | 5.3 | 10  | 9.3±1.1    | 93.0  | 5.9 |
|                  |            | 50  | 53.6±2.7   | 107.2 | 2.5 | 50  | 49.6±2.7   | 99.2  | 2.7 |
|                  | Ioxynil    | 100 | 96.7±3.6   | 96.7  | 1.9 | 100 | 99.9±4.6   | 99.9  | 2.3 |
|                  |            | 500 | 487.9±13.2 | 97.6  | 1.4 | 500 | 492.2±16.8 | 98.4  | 1.7 |

**Note:** (1) ER indicates extraction recovery; (2) RSD indicates relative standard deviations.
