# Supplementary figures and images for: Effervescent tablet-enhanced acidic ionic liquid-assisted in situ solvent formation magnetic solid-phase extraction for the detection of three phenolic pesticides in four kinds of crop flour samples
Source: Royal Society of Chemistry journal article supplement (doi:10.1039/d4nj01294a), 2024-01-01

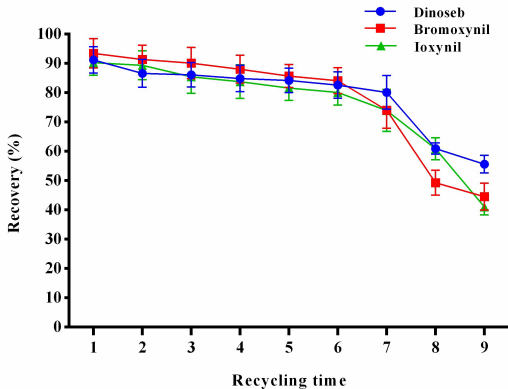

Supplement: d4nj01294a1.pdf [file d4nj01294a1.pdf]
